# Supplementary material for: Enhancing the thermostability ofRhizopus oryzaelipase by combined mutation of hot-spots and engineering a disulfide bond
Source: Royal Society of Chemistry journal article supplement (doi:10.1039/c8ra07767c), 2018-01-01
Supplement: c8ra07767c1.pdf [file c8ra07767c1.pdf]

## Supplementary material

1. Codon-optimized gene sequence of *Rhizopus oryzae* lipase (GenBank: GQ502721.1) based on

*Pichia pastoris* was listed below:

```
atggtttcattcatttccatttctcaaggtgtagctttgtcttctgtcttccatgatgctcggttcatctgctgttctgttctggtaaacttgatct
tccactaccgccgtctctgcatctgacaattctgccctccctctctcatttccagccgttgctcctccttaacaagggaaagtaaagcgatc
ttcaagctgaaccttactacatgcaaagaatacagaatggatgagctccatgggtggcaacctgacatccatcggaaagcgagatgacaattt
ggttggtggcatgacttggattacctagcggatgctcctctatcagcctctctggatctaccaacagcgcctctgatgggtgtaagggtgctgct
gctactactgctcaaattcaagagttcaccaagtagctggatcgctgccactgcctactgtcgttctgttgcctggtaacaagtgaggactgtg
tccaatgtcaaaagtggttctctgatggcaagatcatcactacctttacctccttgccttccgacacaaatggttacgtcttgagaagtataaaca
aaagaccatttatcttgtttccgtgggtaccaactcctcagaagtgccatcactgatattgttcaactttccgactacaagcctgtcaagggcg
ccaaggtcatgctggttcccttctcttatgagcaagttgcaatgactattccctgtcatccaagaacaactgaccgtaaccctactfacaag
gtcatcgttaccggctactcactcgggtgggcacaagctttgcttccggatggatctctaccaacgtgaaccaagattgtctccaagaatttg
agcatcttactgttgggtgctcctgtgttgtaacccaccttcttactatgttgaatctaccggtattccttccaacgtaccgttcacaagaga
gatategttcctcacgttctcctcaatcctcggattccttcaccccggtgttgaatcttggatcaagtccggctacctccaacgttcaaatctgact
tctgaaattgaaaccaaggattgcagtaactctatcgttcccttcacctctccttgatcacttgagttactttgatatcaacgaaggaagctgtttgt
aa
```

2. **Amino acid sequence of *Rhizopus oryzae* lipase.**

The entire protein contains 392 amino acid residues[1]. From the first amino acid residue to the 26th is the signal peptide, followed by a 96 amino acid residue leader peptide. The mature peptide starts from the 124th amino acid residue and has a total of 269 amino acid residues. Gene cloning begins from the leader peptide, but the amino acid residual numbering in the article begins from the mature peptide. Amino acid sequence of *Rhizopus oryzae* lipase was shown in figure S1:

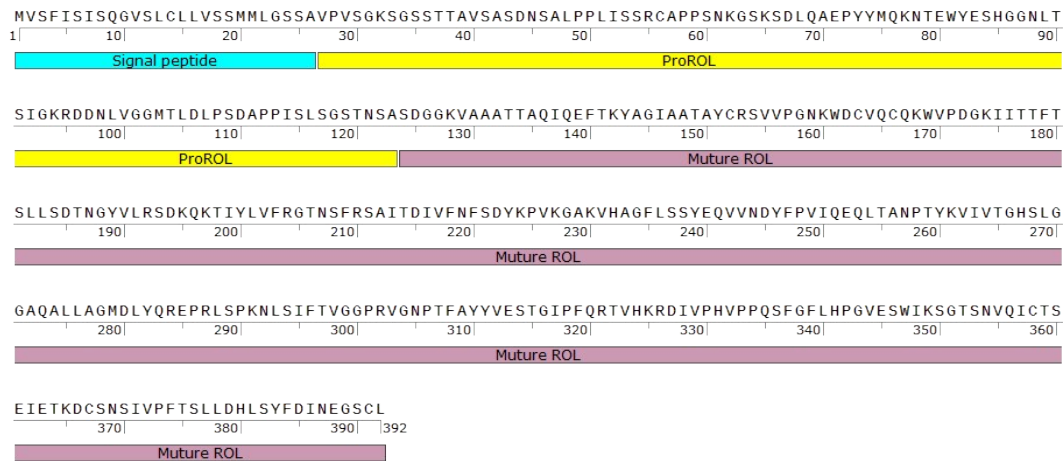

Figure S1. Amino acid sequence of *Rhizopus oryzae* lipase

### 3. Results of disulfide bond prediction by DbD2

Table S1. Results of disulfide bond prediction by DbD2

| Predicted Disulfide Bond | Original Residues  | Score | Energy | Bad Contacts | Thermal Mobility | Sequence Separation | Residue Depth | Volume Change | Environment | Chi3   |
|--------------------------|--------------------|-------|--------|--------------|------------------|---------------------|---------------|---------------|-------------|--------|
| CYS106:SG - CYS185:SG    | A:ALA106, A:PHE185 | 97.7  | 1.15   | 0            | 32.51            | 79                  | 5.91          | -75.6         | Coil-Helix  | 102.1  |
| CYS112:SG - CYS149:SG    | A:PHE112, A:ALA149 | 97.63 | 1.19   | 0            | 26.87            | 37                  | 6.64          | -75.6         | Helix-Helix | -115.7 |
| CYS190:SG - CYS238:SG    | A:GLU190, A:GLU238 | 95.82 | 2.09   | 0            | 38.48            | 48                  | 3.78          | -76.6         | Coil-Helix  | -95.3  |
| CYS203:SG - CYS253:SG    | A:ARG203, A:SER253 | 94.49 | 2.75   | 0            | 45.27            | 50                  | 4.38          | -82.7         | Coil-Turn   | 102.1  |
| CYS186:SG - CYS217:SG    | A:ALA186, A:LEU217 | 93.9  | 3.05   | 0            | 24.77            | 31                  | 4.99          | -46.9         | Coil-Helix  | 104.8  |
| CYS196:SG - CYS220:SG    | A:PHE196, A:GLY220 | 92.95 | 3.52   | 0            | 31.19            | 24                  | 5.77          | -49.9         | Coil-Sheet  | 85.2   |
| CYS20:SG - CYS173:SG     | A:TYR20, A:PHE173  | 91.57 | 4.21   | 0            | 26.41            | 153                 | 8.22          | -182.6        | Helix-Sheet | -122.2 |
| CYS49:SG - CYS72:SG      | A:ASP49, A:LYS72   | 91.09 | 4.46   | 0            | 42.54            | 23                  | 3.42          | -80.4         | Turn-Turn   | 160.6  |
| CYS141:SG - CYS151:SG    | A:VAL141, A:ALA151 | 90.36 | 4.82   | 0            | 21.44            | 10                  | 10.7          | -21.5         | Helix-Sheet | 169.1  |
| CYS54:SG - CYS67:SG      | A:THR54, A:VAL67   | 89.61 | 5.2    | 0            | 26.85            | 13                  | 5.7           | -52.2         | Sheet-Sheet | 148.3  |
| CYS210:SG - CYS216:SG    | A:PRO210, A:PHE216 | 89.6  | 5.2    | 0            | 22.23            | 6                   | 5.65          | -109.1        | Coil-Coil   | -110   |
| CYS200:SG - CYS207:SG    | A:VAL200, A:PRO207 | 88.12 | 5.94   | 0            | 33.03            | 7                   | 8.93          | -55           | Helix-Sheet | -110.5 |
| CYS33:SG - CYS55:SG      | A:VAL33, A:THR55   | 87.8  | 6.1    | 0            | 28.84            | 22                  | 5.27          | -52.2         | Sheet-Turn  | -77.1  |
| CYS105:SG - CYS184:SG    | A:GLY105, A:THR184 | 86.18 | 6.91   | 0            | 28.97            | 79                  | 3.11          | 22.5          | Helix-Turn  | 53.7   |
| CYS81:SG - CYS115:SG     | A:SER81, A:SER115  | 86.07 | 6.97   | 0            | 32.69            | 54                  | 3.83          | 17.5          | Helix-Turn  | 80.8   |
| CYS56:SG - CYS122:SG     | A:PHE56, A:ASP122  | 85.75 | 7.13   | 0            | 28.21            | 66                  | 3.52          | -103.5        | Helix-Sheet | -86.1  |
| CYS26:SG - CYS42:SG      | A:THR26, A:GLN42   | 85.67 | 7.16   | 0            | 28.59            | 16                  | 6.95          | -63.6         | Helix-Helix | 168.6  |
| CYS65:SG - CYS80:SG      | A:GLY65, A:PHE80   | 85.29 | 7.35   | 0            | 24.71            | 15                  | 9.81          | -49.9         | Sheet-Sheet | 109.8  |
| CYS27:SG - CYS81:SG      | A:ALA27, A:ARG81   | 85.26 | 7.37   | 0            | 25.42            | 54                  | 8.49          | -77.8         | Sheet-Turn  | -85.9  |
| CYS224:SG - CYS245:SG    | A:TRP224, A:SER245 | 84.98 | 7.51   | 0            | 39.1             | 21                  | 7.5           | -118.1        | Helix-Sheet | -141.6 |
| CYS58:SG - CYS63:SG      | A:SER58, A:THR63   | 84.51 | 7.75   | 0            | 23.95            | 5                   | 5.3           | -8.1          | Sheet-Sheet | 151    |
| CYS145:SG - CYS176:SG    | A:SER145, A:GLY176 | 83.76 | 8.12   | 0            | 25.12            | 31                  | 10.74         | 48.2          | Coil-Turn   | 106.3  |
| CYS24:SG - CYS144:SG     | A:ALA24, A:HIS144  | 83.72 | 8.14   | 0            | 18.98            | 120                 | 11.7          | -41.9         | Helix-Sheet | -161.2 |
| CYS108:SG - CYS181:SG    | A:VAL108, A:GLY181 | 83.09 | 8.46   | 0            | 24.4             | 73                  | 7.66          | 4.1           | Coil-Sheet  | 83.1   |
| CYS98:SG - CYS110:SG     | A:SER98, A:ALA110  | 80.96 | 9.52   | 0            | 34.58            | 12                  | 3.49          | 22.5          | Helix-Sheet | 118.7  |
| CYS107:SG - CYS182:SG    | A:LYS107, A:ASN182 | 80.08 | 9.96   | 0            | 27.94            | 75                  | 4.7           | -88.8         | Coil-Sheet  | 164.7  |
| CYS204:SG - CYS256:SG    | A:ASP204, A:ASP256 | 66.63 | 6.68   | 1            | 40.05            | 52                  | 6.07          | -28.4         | Coil-Helix  | -78.1  |

#### 4. Primers

Table S2. Primers used in this work

| Mutants | Primers                                       |
|---------|-----------------------------------------------|
| Q15N    | Farward:5'ACTACTGCTCAAATTAACGAGTTTACCAAG3'    |
|         | Reverse:5'CTTGGTAAACTCGTTAATTTGAGCAGTAGT3'    |
| A24S    | Farward:5'AAGTACGCTGGTATTTCTGCAACTGCTTAT3'    |
|         | Reverse:5'ATAAGCAGTTGCAGAAATACCAGCGTACTT3'    |
| V41I    | Farward:5'AACAAATGGGATTGTATCCAGTGTGAGAAG3'    |
|         | Reverse:5'CTTCTGACACTGGATAACAATCCCATTTGTT3'   |
| L68A    | Farward:5'ACAAACGGTTACGTCGCTAGAAGTGATAAA3'    |
|         | Reverse:5'TTTATCACTTCTAGCGACGTAACCGTTTGT3'    |
| A110D   | Farward:5'GGTGCCAAAGTGCATGATGGATTCCCTAAGT3'   |
|         | Reverse:5'ACTTAGGAATCCATCATGCACTTTGGCACC3'    |
| Y123L   | Farward:5'CAAGTCGTGAACGATTTGTTCCAGTGGTT3'     |
|         | Reverse:5'AACCACTGGGAACAAATCGTTCACGACTTG3'    |
| E129D   | Farward:5'TTCCCAGTGGTTCAAGATCAATTGACGGCC3'    |
|         | Reverse:5'GGCCGTCAATTGATCTTGAACCACTGGGAA3'    |
| T184A   | Farward:5'AGAGTTGGCAATCCCGCCTTTGCCTATTAT3'    |
|         | Reverse:5'ATAATAGGCAAAGGCGGGATTGCCAACTCT3'    |
| V209L   | Farward:5'GACATTGTTCCACACCTACCACCACAATCA3'    |
|         | Reverse:5'TGATTGTGGTGGTAGGTGTGGAACAATGTC3'    |
| S223Y   | Farward:5'CACCCCGGCGTTGAATATTGGATTAAGTCC3'    |
|         | Reverse:5'GGACTTAATCCAATATTCAACGCCGGGGTG3'    |
| D262G   | Farward:5'CACTTATCCTACTTTGGGATTAATGAGGGG3'    |
|         | Reverse:5'CCCCTCATTAAATCCCAAAGTAGGATAAGTG3'   |
| A106C   | Farward:5'AAACCCGTCAAAGTTGTAAAGTGCATGCCGGA3'  |
|         | Reverse:5'TCCGGCATGCACTTTACAACCTTTGACGGGTTT3' |
| F185C   | Farward:5'GTTGGCAATCCCACATGTGCCTATTATGTTGAA3' |
|         | Reverse:5'TTCAACATAATAGGCACATGTGGGATTGCCAAC3' |
| F112C   | Farward:5'AAAGTGCATGCCGGATGTCTAAGTTCTTATGAA3' |
|         | Reverse:5'TTCATAAGAACTTAGACATCCGGCATGCACTTT3' |
| A149C   | Farward:5'CATAGTTTGGGTGGATGTCAAGCCTTACTAGCC3' |
|         | Reverse:5'GGCTAGTAAGGCTTGACATCCACCCAACTATG3'  |
| E190C   | Farward:5'TTTGCCTATTATGTTTGTCCACTGGCATAACCA3' |
|         | Reverse:5'TGGTATGCCAGTGAACAACATAAATAGGCAAA3'  |
| E238C   | Farward:5'CAAATTTGTACTTCCTGTATTGAAACCAAAGAC3' |
|         | Reverse:5'GTCTTTGGTTTCAATACAGGAAGTACAAATTTG3' |
| R203C   | Farward:5'AGGACTGTTCAAGTGTGACATTGTTCCACAC3'   |
|         | Reverse:5'GTGTGGAACAATGTCACACTTGTGAACAGTCCT3' |

|              |                                                                                                 |
|--------------|-------------------------------------------------------------------------------------------------|
| <b>S253C</b> | Farward:5'ATAGTCCCCTTCACCTGTTTATTAGACCACTTA3'<br>Reverse:5'TAAGTGGTCTAATAAACAGGTGAAGGGGACTAT3'  |
| <b>A186C</b> | Farward:5'GGCAATCCCACATTTTGTATTATGTTGAATCC3'<br>Reverse:5'GGATTCAACATAATAACAAAATGTGGGATTGCC3'   |
| <b>L217C</b> | Farward:5'CAATCATTTGGGTTTTGTACACCCCGGCGTTGAA3'<br>Reverse:5'TTCAACGCCGGGGTGACAAAACCCAAATGATTG3' |
| <b>F196C</b> | Farward:5'TCCACTGGCATAACCATGTCAAAGGACTGTTAC3'<br>Reverse:5'GTGAACAGTCCTTTGACATGGTATGCCAGTGGAA3' |
| <b>G220C</b> | Farward:5'GGGTTTCTACACCCCTGTGTTGAATCTTGGATT3'<br>Reverse:5'AATCCAAGATTCAACACAGGGGTGTAGAAACCC3'  |
| <b>Y20C</b>  | Farward:5'CAGGAGTTTACCAAGTGTGCTGGTATTGCTGCA3'<br>Reverse:5'TGCAGCAATACCAGCACACTTGGTAAACTCCTG3'  |
| <b>F173C</b> | Farward:5'AAGAACTTGTC AATATGTACGGTCGGAGGACCA3'<br>Reverse:5'TGGTCCTCCGACCGTACATATTGACAAGTTCTT3' |
| <b>D49C</b>  | Farward:5'CAGAAGTGGGTTCTTGTGGAAAGATCATCACA3'<br>Reverse:5'TGTGATGATCTTTCCACAAGGAACCCACTTCTG3'   |
| <b>K72C</b>  | Farward:5'GTCTTGAGAAGTGATTGTCAGAAGACCATCTAC3'<br>Reverse:5'GTAGATGGTCTTCTGACAATCACTTCTCAAGAC3'  |
| <b>V141C</b> | Farward:5'ACTTACAAAGTAATATGTACCGGTCATAGTTTG3'<br>Reverse:5'CAA ACTATGACCGGTACATATTACTTTGTAAGT3' |
| <b>A151</b>  | Farward:5'TTGGGTGGAGCACAATGTTTACTAGCCGGAATG3'<br>Reverse:5'CATTCCGGCTAGTAAACATTGTGCTCCACCCAA3'  |

Reference:

- [1] M. Ueda, S. Takahashi, M. Washida, S. Shiraga, A. Tanaka, Expression of *Rhizopus oryzae* lipase gene in *Saccharomyces cerevisiae*, *Journal of Molecular Catalysis B Enzymatic* 17(3) (2002) 113-124.
